# Supplementary material
Source: Springer Nature journal article supplement (https://www.springermedizin.de/resource/supplementary/12874_2013_1014_MOESM3_ESM.rdata/9433078)
Supplement: MOESM3 [file 9433078]

Archive with 1 entries (1 files):
- 9433078.out
